# Supplementary material
Source: publisher site journal article supplement (https://www.dovepress.com/get_supplementary_file.php?f=479714.docx)
Supplement: Supplementary file 1 [file get_supplementary_file.php]

**Table S1. The level of *Aspergillus fumigatus*-specific IgG antibody in probable and proven CPA patients**

| Items | Probable CPA | Proven CPA |
| --- | --- | --- |
| Cases | 32 | 22 |
| Aspergillus-specific IgG antibody（AU/mL） | 131.3 (47.0,250.8) | 58.8 (31.3,132.8) |

Proven CPA should meet inclusion criteria and histopathological evidence, or positive culture result from sterile environment. Probable CPA required inclusion criteria and mycologic evidence such as galactomannan test, positive culture result, *Aspergillus* PCR, etc.

**Table S2. The level of *Aspergillus fumigatus*-specific IgG antibody among five subtypes of CPA patients**

| Items | Aspergilloma | CCPA | CFPA | *Aspergillus* nodule | CNPA |
| --- | --- | --- | --- | --- | --- |
| Cases | 9 | 16 | 4 | 6 | 19 |
| *Aspergillus*-specific IgG antibody（AU/mL） | 46.0 (31.3,176.6) | 179.5±152.6 | 60.3 (37.8,390.8) | 90.2±40.0 | 128.4 (31.1,210.0) |

CCPA: Chronic cavitary pulmonary aspergillosis; CFPA: Chronic fibrosing pulmonary aspergillosis; CNPA: Chronic necrotizing pulmonary aspergillosis

**Table S3. A multivariate linear regression analysis for relationship between *Aspergillus fumigatus*-specific IgG antibody levels and other clinical factors**

| Items | B | β | 95% Confidence Interval | | *p* value |
| --- | --- | --- | --- | --- | --- |
| Lower limit | Upper Limit |
| CPA | 83.956 | 0.359 | 42.957 | 124.955 | < 0.001 |
| Lung cancer | 63.621 | 0.217 | 10.032 | 117.210 | 0.020 |
| Expectoration | 59.068 | 0.238 | 9.214 | 108.923 | 0.021 |
| PLT | 0.265 | 0.261 | 0.033 | 0.496 | 0.025 |
| Albumin | -4.174 | -0.249 | -9.213 | -0.214 | 0.040 |

CPA: Chronic pulmonary aspergillosis; PLT: Platelets
